# Supplementary material for: Folate-conjugated poly(N-(2-hydroxypropyl)methacrylamide-co-methacrylic acid) nanohydrogels with pH/redox dual-stimuli response for controlled drug release
Source: Royal Society of Chemistry journal article supplement (doi:10.1039/c3py00249g), 2013-01-01
Supplement: c3py00249g.pdf [file c3py00249g.pdf]

## Supporting Information

Folate-conjugated poly(*N*-(2-hydroxypropyl) methacrylamide-co-methacrylic acid) nanohydrogels with pH/redox dual-stimuli response for controlled drug release

Yuan-Jia Pan, Dian Li, Sha Jin, Chuan Wei, Ke-Yi Wu, Jia Guo, Chang-Chun Wang\*

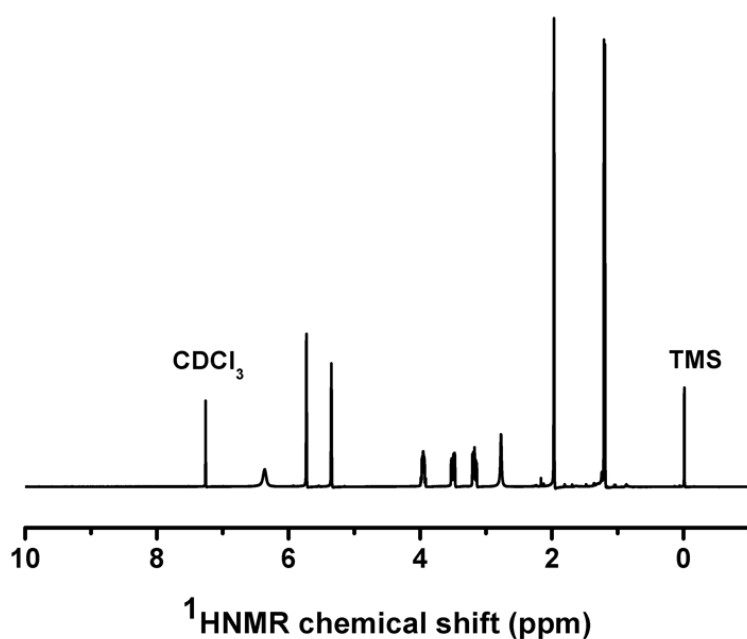

Figure S1. <sup>1</sup>H NMR spectra of HPMA.

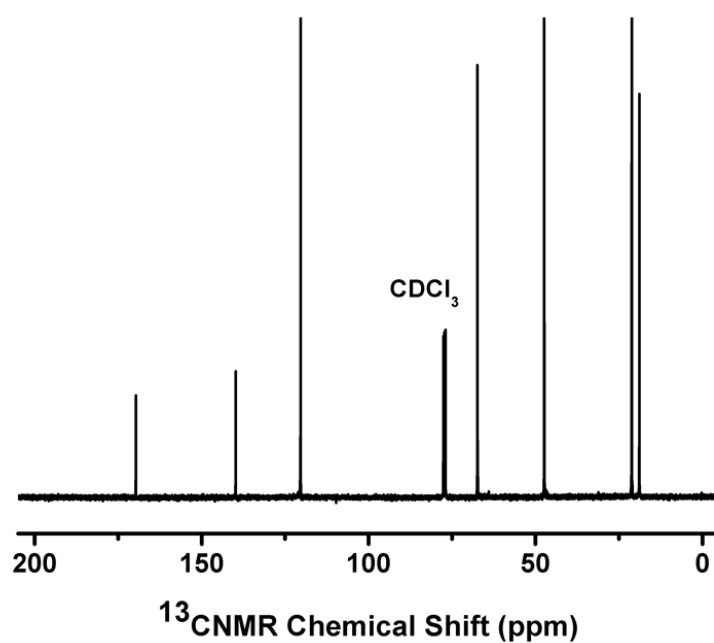

**Figure S2.**  $^{13}\text{C}$  NMR spectra of HPMa.

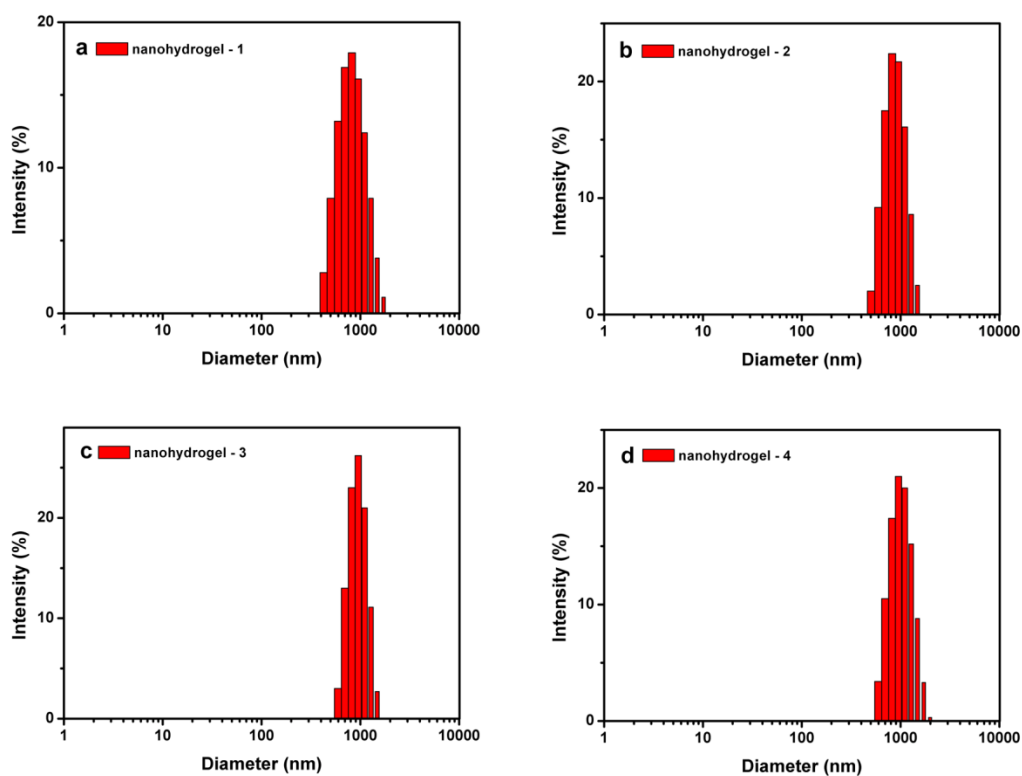

**Figure S3.** The DLS curves of P(HPMA-co-MAA) nanohydrogels with different HPMA contents: (a) 0 wt%, (b) 20 wt%, (c) 30 wt% and (d) 40 wt%.

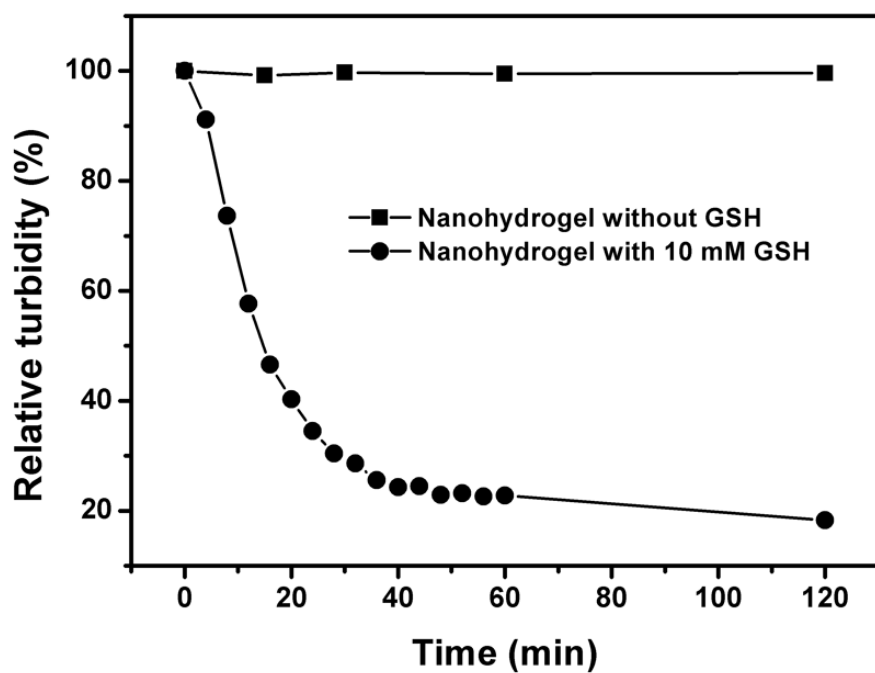

**Figure S4.** The curves of redox-induced (10 mM GSH) nanohydrogel degradation by turbidity measurement: (a) P(HPMA-co-MAA) (40% HPMA) without adding GSH, (b) P(HPMA-co-MAA) (40% HPMA) with 10 mM GSH.

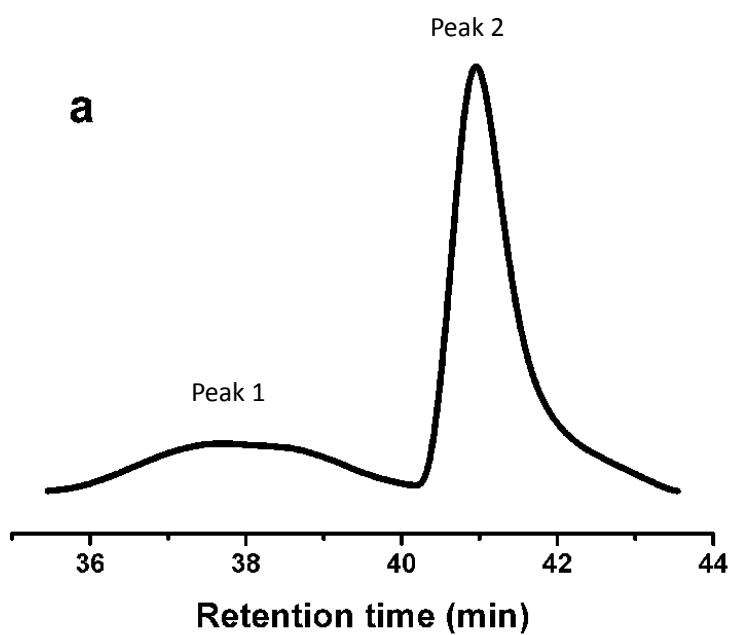

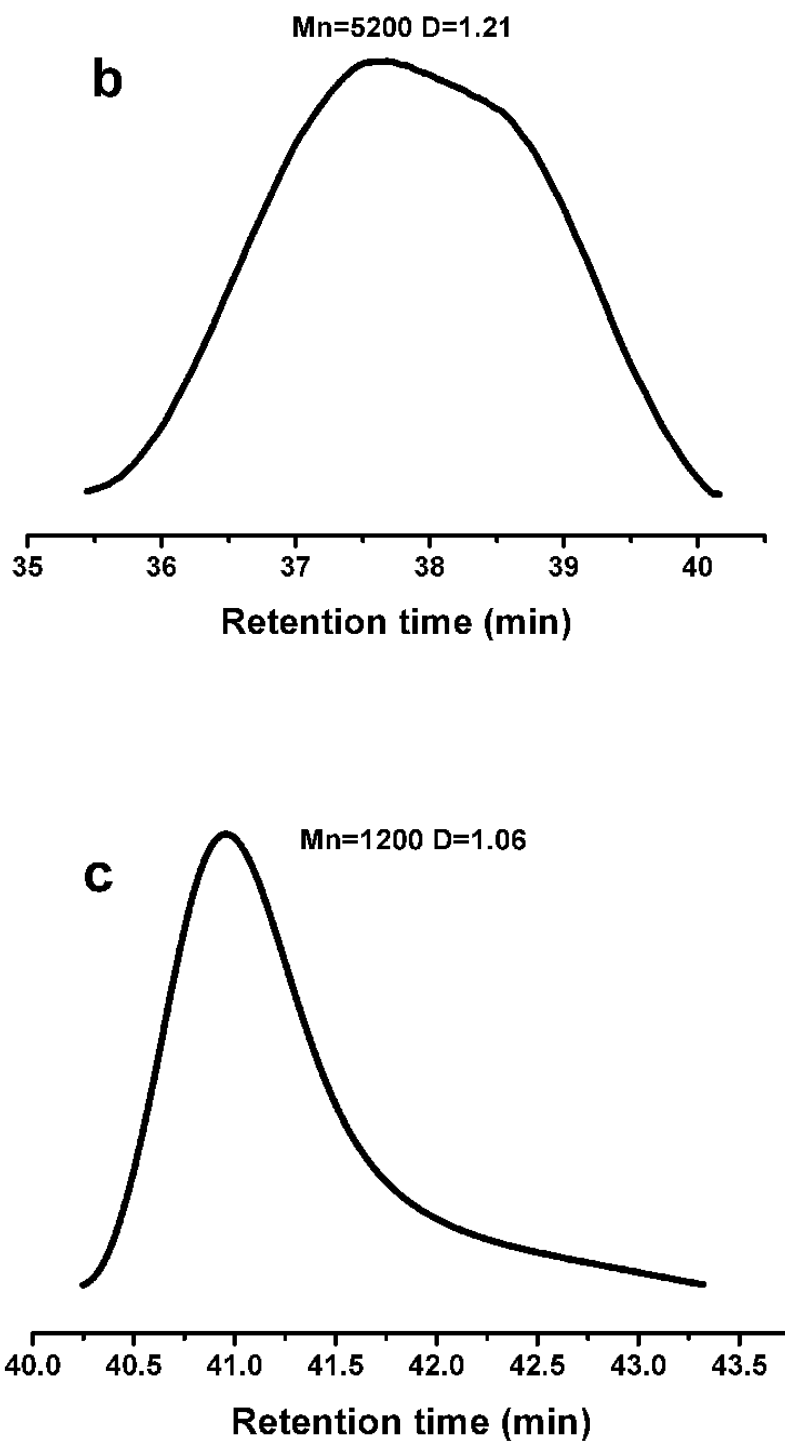

**Figure S5.** The GPC curves of the redox degradation of disulfide-containing P(HPMA-co-MAA) nanohydrogels (40% HPMA): (a) total peak, (b) peak 1, (c) peak 2, in the presence of GSH (10 mM), here D value in figures is polydispersity index ( $PDI=M_w/M_n$ ).
